# Supplementary material
Source: Springer Nature journal article supplement (https://www.springermedizin.de/resource/supplementary/12889_2010_2210_MOESM4_ESM.pdf/9484972)

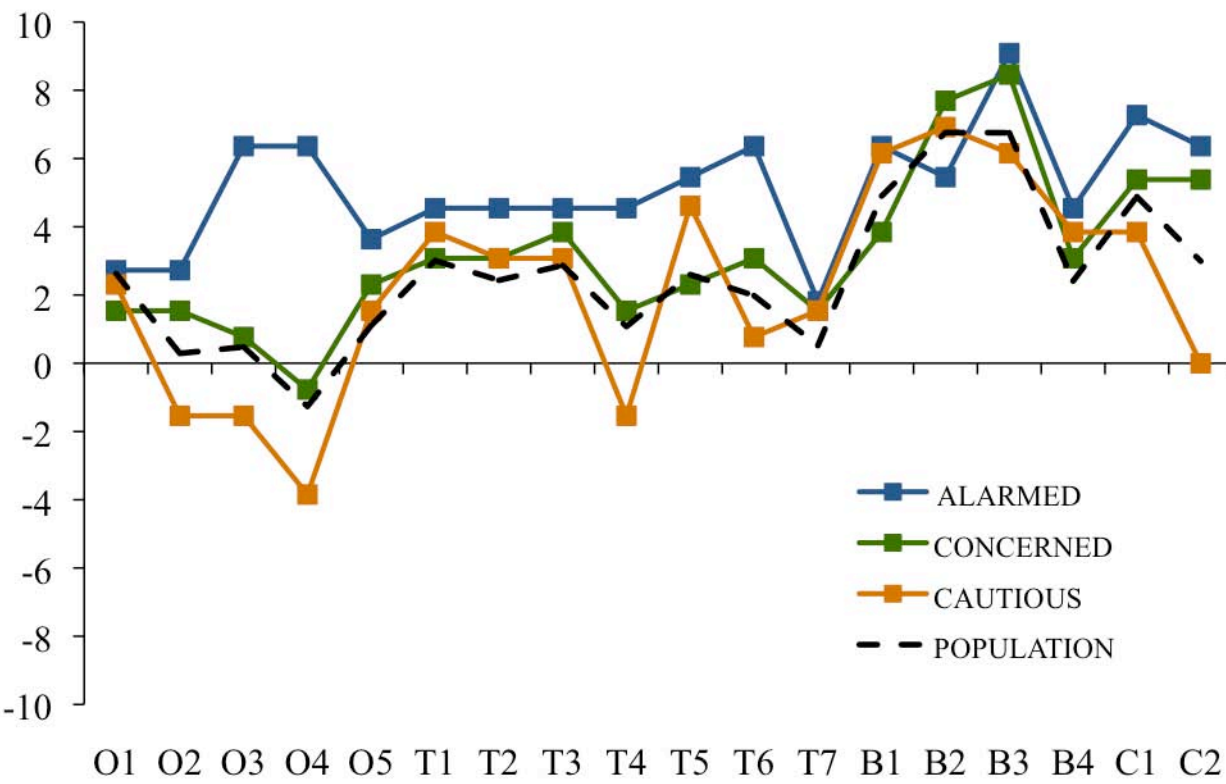

Supplement: MOESM4 [file 9484972]
